# Supplementary material for: Genome-Wide Identification and Expression Profiling of Potassium Transport-Related Genes in Vigna radiata under Abiotic Stresses
Source: MDPI journal article supplement (doi:10.3390/plants11010002), 2021-12-21
Supplement: s1 [file s1]

|                 |                |                |                |               |               |               |               |                |                |                 |                |                |               |  |  |  |  |
|-----------------|----------------|----------------|----------------|---------------|---------------|---------------|---------------|----------------|----------------|-----------------|----------------|----------------|---------------|--|--|--|--|
| VrKUP/HAK/KT4   | Exon 1<br>140  | Exon 2<br>244  | Exon 3<br>249  | Exon 4<br>51  | Exon 5<br>261 | Exon 6<br>53  | Exon 7<br>255 | Exon 8<br>160  | Exon 9<br>645  |                 |                |                |               |  |  |  |  |
| VrKUP/HAK/KT17  | Exon 1<br>258  | Exon 2<br>226  | Exon 3<br>222  | Exon 4<br>51  | Exon 5<br>261 | Exon 6<br>53  | Exon 7<br>220 | Exon 8<br>145  | Exon 9<br>125  | Exon 10<br>152  | Exon 11<br>112 | Exon 12<br>160 | Exon 13<br>60 |  |  |  |  |
| VrKUP/HAK/KT1.1 | Exon 1<br>258  | Exon 2<br>244  | Exon 3<br>246  | Exon 4<br>51  | Exon 5<br>261 | Exon 6<br>53  | Exon 7<br>87  | Exon 8<br>562  |                |                 |                |                |               |  |  |  |  |
| VrKUP/HAK/KT1.2 | Exon 2<br>493  | Exon 1<br>559  | Exon 3<br>246  | Exon 4<br>51  | Exon 5<br>261 | Exon 6<br>124 | Exon 7<br>56  | Exon 8<br>97   | Exon 9<br>124  |                 |                |                |               |  |  |  |  |
| VrKUP/HAK/KT8.1 | Exon 1<br>216  | Exon 2<br>159  | Exon 3<br>226  | Exon 4<br>51  | Exon 5<br>261 | Exon 6<br>261 | Exon 7<br>168 | Exon 8<br>265  |                |                 |                |                |               |  |  |  |  |
| VrKUP/HAK/KT6.2 | Exon 1<br>286  | Exon 2<br>156  | Exon 3<br>249  | Exon 4<br>51  | Exon 5<br>261 | Exon 6<br>54  | Exon 7<br>192 | Exon 8<br>954  |                |                 |                |                |               |  |  |  |  |
| VrKUP/HAK/KT6.1 | Exon 1<br>300  | Exon 2<br>116  | Exon 3<br>157  | Exon 4<br>51  | Exon 5<br>261 | Exon 6<br>54  | Exon 7<br>251 | Exon 8<br>1034 |                |                 |                |                |               |  |  |  |  |
| VrKUP/HAK/KT3   | Exon 1<br>505  | Exon 2<br>229  | Exon 3<br>157  | Exon 4<br>51  | Exon 5<br>261 | Exon 6<br>54  | Exon 7<br>251 | Exon 8<br>53   | Exon 9<br>118  |                 |                |                |               |  |  |  |  |
| VrKUP/HAK/KT11  | Exon 1<br>246  | Exon 2<br>275  | Exon 3<br>226  | Exon 4<br>51  | Exon 5<br>261 | Exon 6<br>55  | Exon 7<br>122 | Exon 8<br>255  | Exon 9<br>353  | Exon 10<br>245  | Exon 11<br>118 |                |               |  |  |  |  |
| VrKUP/HAK/KT8.2 | Exon 1<br>505  | Exon 2<br>229  | Exon 3<br>226  | Exon 4<br>51  | Exon 5<br>261 | Exon 6<br>52  | Exon 7<br>129 | Exon 8<br>234  | Exon 9<br>1018 |                 |                |                |               |  |  |  |  |
| VrKUP/HAK/KT2   | Exon 1<br>505  | Exon 2<br>229  | Exon 3<br>224  | Exon 4<br>51  | Exon 5<br>261 | Exon 6<br>54  | Exon 7<br>115 | Exon 8<br>255  | Exon 9<br>496  | Exon 10<br>345  | Exon 11<br>287 |                |               |  |  |  |  |
| VrKUP/HAK/KT7   | Exon 1<br>587  | Exon 2<br>319  | Exon 3<br>226  | Exon 4<br>51  | Exon 5<br>261 | Exon 6<br>246 | Exon 7<br>168 | Exon 8<br>255  | Exon 9<br>1168 | Exon 10<br>1219 |                |                |               |  |  |  |  |
| VrKUP/HAK/KT5   | Exon 1<br>587  | Exon 2<br>319  | Exon 3<br>226  | Exon 4<br>51  | Exon 5<br>261 | Exon 6<br>246 | Exon 7<br>168 | Exon 8<br>255  | Exon 9<br>1168 |                 |                |                |               |  |  |  |  |
| VrKUP/HAK/KT1.2 | Exon 1<br>505  | Exon 2<br>229  | Exon 3<br>250  | Exon 4<br>51  | Exon 5<br>261 | Exon 6<br>107 | Exon 7<br>115 | Exon 8<br>255  | Exon 9<br>145  |                 |                |                |               |  |  |  |  |
| VrKUP/HAK/KT10  | Exon 1<br>587  | Exon 2<br>319  | Exon 3<br>226  | Exon 4<br>51  | Exon 5<br>261 | Exon 6<br>53  | Exon 7<br>114 | Exon 8<br>243  | Exon 9<br>118  |                 |                |                |               |  |  |  |  |
| VrKUP/HAK/KT13  | Exon 1<br>218  | Exon 2<br>118  | Exon 3<br>226  | Exon 4<br>51  | Exon 5<br>261 | Exon 6<br>55  | Exon 7<br>216 | Exon 8<br>128  | Exon 9<br>238  |                 |                |                |               |  |  |  |  |
| VrKUP/HAK/KT14  | Exon 1<br>140  | Exon 2<br>231  | Exon 3<br>265  | Exon 4<br>51  | Exon 5<br>261 | Exon 6<br>51  | Exon 7<br>193 | Exon 8<br>138  | Exon 9<br>137  |                 |                |                |               |  |  |  |  |
| VrKUP/HAK/KT15  | Exon 1<br>300  | Exon 2<br>156  | Exon 3<br>275  | Exon 4<br>51  | Exon 5<br>261 | Exon 6<br>52  | Exon 7<br>163 | Exon 8<br>144  | Exon 9<br>122  |                 |                |                |               |  |  |  |  |
| VrKUP/HAK/KT16  | Exon 1<br>244  | Exon 2<br>159  | Exon 3<br>250  | Exon 4<br>51  | Exon 5<br>261 | Exon 6<br>246 | Exon 7<br>112 |                |                |                 |                |                |               |  |  |  |  |
| VrHKT1.1        | Exon 1<br>1346 | Exon 2<br>202  | Exon 3<br>599  |               |               |               |               |                |                |                 |                |                |               |  |  |  |  |
| VrHKT1.2        | Exon 3<br>338  | Exon 2<br>202  | Exon 1<br>1218 |               |               |               |               |                |                |                 |                |                |               |  |  |  |  |
| VrKEA2.1        | Exon 1<br>248  | Exon 2<br>1668 | Exon 3<br>172  | Exon 4<br>191 | Exon 5<br>62  | Exon 6<br>53  | Exon 7<br>60  | Exon 8<br>120  | Exon 9<br>112  | Exon 10<br>118  | Exon 11<br>118 |                |               |  |  |  |  |
| VrKEA2.2        | Exon 1<br>510  | Exon 2<br>44   | Exon 3<br>59   | Exon 4<br>64  | Exon 5<br>62  |               |               |                |                |                 |                |                |               |  |  |  |  |
| VrKEA3          | Exon 1<br>196  | Exon 2<br>203  | Exon 3<br>408  | Exon 4<br>369 | Exon 5<br>62  | Exon 6<br>81  | Exon 7<br>102 | Exon 8<br>78   | Exon 9<br>822  | Exon 10<br>112  | Exon 11<br>76  | Exon 12<br>53  |               |  |  |  |  |
| VrKEA4          | Exon 1<br>592  | Exon 2<br>44   | Exon 3<br>59   | Exon 4<br>79  | Exon 5<br>62  | Exon 6<br>76  | Exon 7<br>72  | Exon 8<br>84   | Exon 9<br>118  | Exon 10<br>58   | Exon 11<br>67  | Exon 12<br>134 |               |  |  |  |  |
| VrKEA5          | Exon 1<br>474  | Exon 2<br>44   | Exon 3<br>78   | Exon 4<br>118 | Exon 5<br>62  | Exon 6<br>76  | Exon 7<br>72  | Exon 8<br>84   | Exon 9<br>69   | Exon 10<br>118  | Exon 11<br>110 |                |               |  |  |  |  |
| VrKEA6          | Exon 1<br>501  | Exon 2<br>44   | Exon 3<br>64   | Exon 4<br>76  | Exon 5<br>62  | Exon 6<br>72  | Exon 7<br>84  | Exon 8<br>54   | Exon 9<br>118  | Exon 10<br>92   | Exon 11<br>76  | Exon 12<br>53  |               |  |  |  |  |
| VrAKT1.1        | Exon 1<br>338  | Exon 2<br>366  | Exon 3<br>58   | Exon 4<br>318 | Exon 5<br>249 | Exon 6<br>99  | Exon 7<br>24  | Exon 8<br>199  | Exon 9<br>53   | Exon 10<br>553  |                |                |               |  |  |  |  |
| VrAKT1.2        | Exon 1<br>310  | Exon 2<br>366  | Exon 3<br>52   | Exon 4<br>322 | Exon 5<br>249 | Exon 6<br>99  | Exon 7<br>24  | Exon 8<br>78   | Exon 9<br>53   | Exon 10<br>67   |                |                |               |  |  |  |  |
| VrAKT2          | Exon 1<br>620  | Exon 2<br>219  | Exon 3<br>159  | Exon 4<br>58  | Exon 5<br>249 | Exon 6<br>240 | Exon 7<br>318 | Exon 8<br>76   | Exon 9<br>55   |                 |                |                |               |  |  |  |  |
| VrAKT3          | Exon 1<br>748  | Exon 2<br>216  | Exon 3<br>156  | Exon 4<br>58  | Exon 5<br>249 | Exon 6<br>240 | Exon 7<br>99  | Exon 8<br>309  | Exon 9<br>53   |                 |                |                |               |  |  |  |  |
| VrAKT4          | Exon 1<br>430  | Exon 2<br>156  | Exon 3<br>58   | Exon 4<br>317 | Exon 5<br>240 | Exon 6<br>249 | Exon 7<br>48  | Exon 8<br>309  | Exon 9<br>253  |                 |                |                |               |  |  |  |  |
| VrTPK1.1        | Exon 1<br>1050 | Exon 2<br>253  | Exon 3<br>154  | Exon 4<br>49  |               |               |               |                |                |                 |                |                |               |  |  |  |  |
| VrTPK1.2        | Exon 1<br>1050 | Exon 2<br>606  |                |               |               |               |               |                |                |                 |                |                |               |  |  |  |  |
| VrTPK3          | Exon 1<br>1050 | Exon 2<br>719  |                |               |               |               |               |                |                |                 |                |                |               |  |  |  |  |
| VrTPK5          | Exon 1<br>104  | Exon 2<br>1050 | Exon 3<br>389  | Exon 4<br>154 | Exon 5<br>67  | Exon 6<br>54  | Exon 7<br>152 | Exon 8<br>51   | Exon 9<br>112  | Exon 10<br>44   |                |                |               |  |  |  |  |
| VrKAT1          | Exon 1<br>786  | Exon 2<br>216  | Exon 3<br>156  | Exon 4<br>58  | Exon 5<br>38  | Exon 6<br>240 | Exon 7<br>99  |                |                |                 |                |                |               |  |  |  |  |
| VrKAT2          | Exon 1<br>279  | Exon 2<br>173  | Exon 3<br>219  | Exon 4<br>163 | Exon 5<br>58  | Exon 6<br>318 | Exon 7<br>246 | Exon 8<br>99   |                |                 |                |                |               |  |  |  |  |

**Supplementary Figure S1.** Conserved exons (in lengths) among VrKUP/HAK/KT, VrHKT, VrKEA, Shaker, and VrTPK families were shown by multiple colors.

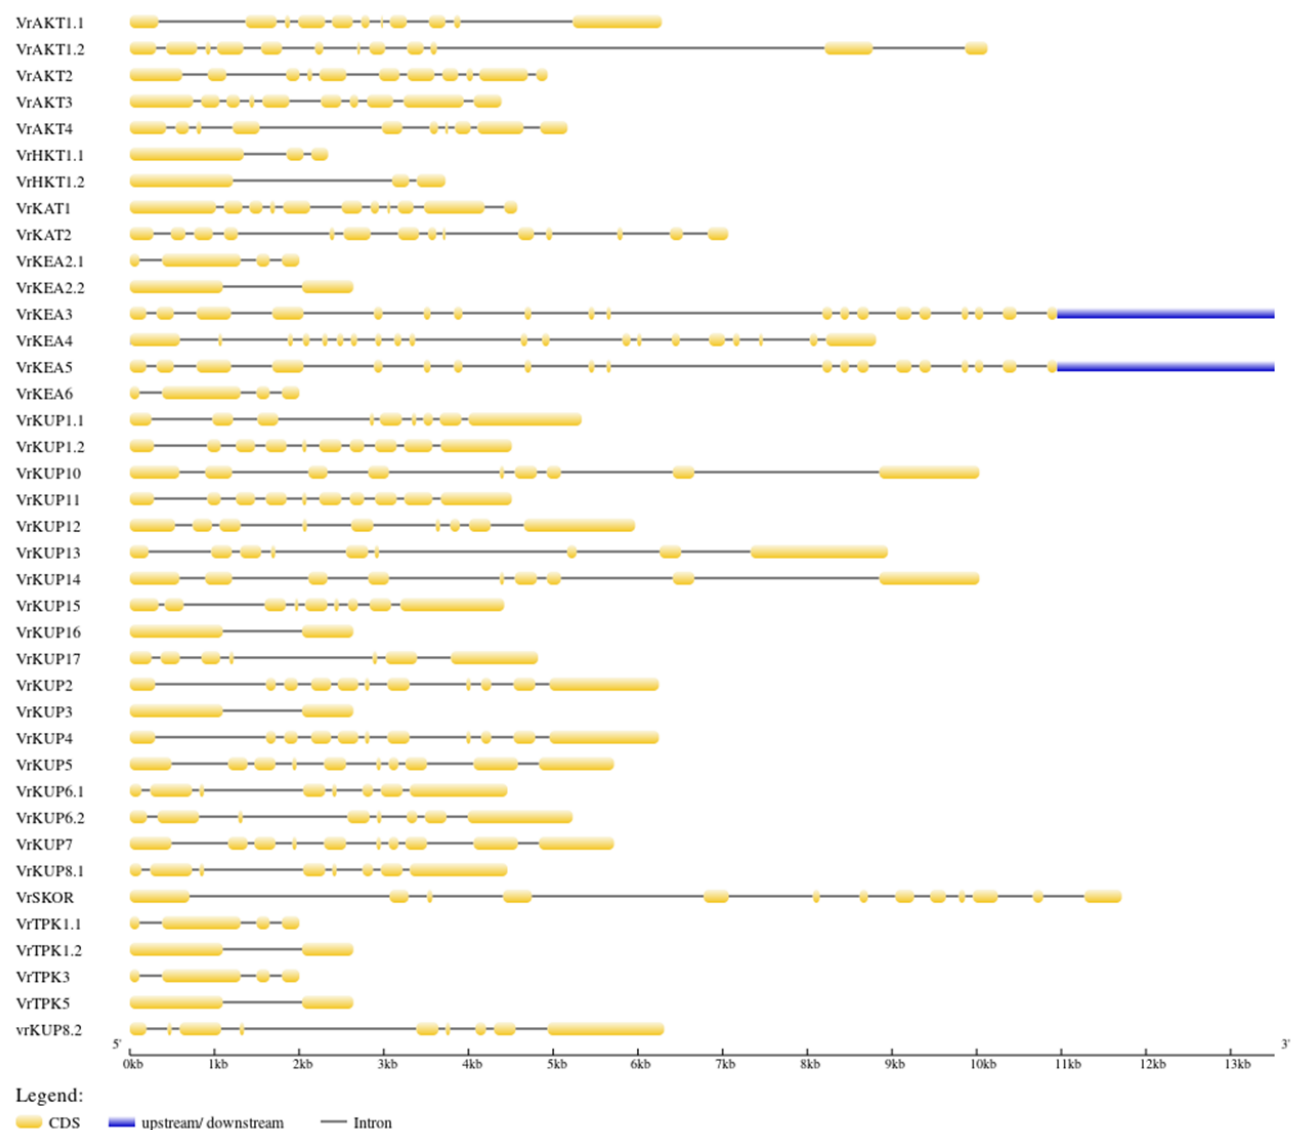

**Supplementary Figure S2.** Structural analysis of potassium channels and transporters genes. Exons and introns of potassium transport-related genes are represented by yellow boxes and black lines respectively. Gene models are based on CDC Frontier genome Cav1.0 gene annotations.

**Supplementary Table S1:** *Cis*- regulatory elements present at the upstream region of potassium channel genes are given.

|                 |                                                                                                                                                                                 |
|-----------------|---------------------------------------------------------------------------------------------------------------------------------------------------------------------------------|
| <b>VrAKT1.1</b> | AAGAA-motif, ABRE, ACE, ATCT-motif, Box II, CAAT-box, CCAAT-box, G-Box, GA-motif, GATA-motif, GT1-motif, HSE, I-box MSA-like Skn-1_motif, box II, rbcS-CMA7a                    |
| <b>VrAKT1.2</b> | AAGAA-motif, ABRE, AATCT-motif, Box II, CAAT-box, CCAAT-box, G-box, GA-motif, GATA-motif, GT1-motif, HSE I-box, MSA-like, Skn-1_motif, TATA-box, box II, rbcS-CMA7a             |
| <b>VrAKT2</b>   | AAGAA-motif, ABRE, ACE, ATCT-motif, Box II, CAAT-box, CCAAT-box G-box, GATA-motif, GT1-motif, HSE I-box, MSA-I, Skn-1_motif, TATA-box, box II, rbcS-CMA7a                       |
| <b>VrAKT3</b>   | AAGAA-motif, ABRE, ACE, ATCT-motif, Box II, CAAT-box, CCAAT-box, G-box, GA-motif, GATA-motif, GT1-motif, HSE, I-box, MSA-like, Skn-1_motif, box II, rbcS-CMA7a                  |
| <b>VrKAT3</b>   | AAGAA-motif, ABRE, ACE, ATCT-motif, Box II, CAAT-box, CCAAT-box, G-Box, GA-motif, GATA-motif, GT1-motif, HSE I-box, MSA-like, Skn-1_motif, TATA-box, box II, rbcS-CMA7a         |
| <b>VrSKOR</b>   | AAGAA-motif, ABRE, ACE, ATCT-motif, Box II, CAAT-box, CCAAT-box, G-box, GA-motif, GATA-motif, GT1-motif, HSE I-box, MSA-like, Skn-1_motif, TATA-box, box II, rbcS-CMA7a         |
| <b>VrAKT4</b>   | AAGAA-motif, ABRE, ACE, ATCT-motif, Box II, CAAT-box, CCAAT-box, G-Box, GA-motif, GATA-motif, GT1-motif, HSE I-box, MSA-like, Skn-1_motif, TATA-box, box II, rbcS-CMA7a         |
| <b>VrTPK5</b>   | AAGAA-motif, ABRE, ACE, ATCT-motif, Box II, CAAT-box, CCAAT-box, G-Box, GA-motif, GATA-motif, GT1-motif, HSE I-box, MSA-like, Skn-1_motif, TATA-box, box II, rbcS-CMA7a         |
| <b>VrTPK1.1</b> | AAGAA-motif, ABRE, ACE, ATCT-motif, CAAT-box, CCAAT-box, G-box, GA-motif, GATA-motif, GT1-motif, HSE I-box, MSA-like, Skn-1_motif, TATA-box, box II, rbcS-CMA7a,                |
| <b>VrTPK1.2</b> | AAGAA-motif<br>ABRE, ACE, ATCT-motif, Box II, CAAT-box, CCAAT-box, G-Box, GA-motif, GATA-motif, GT1-motif, HSE, I-box, MSA-like, Skn-1_motif, TATA-box, box II, rbcS-CMA7a      |
| <b>VrTPK3</b>   | AAGAA-motif, ABRE, ACE, ATCT-motif, Box II, CAAT-box, CCAAT-box, G-Box, GA-motif, GATA-motif, GT1-motif, HSE I-box, MSA-like, Skn-1_motif, TATA-box, box II, rbcS-CMA7a         |
| <b>VrKAT1</b>   | AAGAA-motif, ABRE, ACE, ATCT-motif, Box II, CAAT-box, CCAAT-box, G-Box, G-box, GA-motif, GATA-motif, GT1-motif, HSE, I-box, MSA-like, Skn-1_motif, TATA-box, box II, rbcS-CMA7a |

**Supplementary Table S2:** *Cis*-regulatory elements present at the upstream region of potassium transporters genes are given.

|                        |                                                                                                                                                                          |
|------------------------|--------------------------------------------------------------------------------------------------------------------------------------------------------------------------|
| <b>VrKUP/HAK/KT4</b>   | AAGAA-motif, ABRE, ACE, ATCT-motif, Box II, CAAT-box CCAAT-box G-Box GA-motif GATA-motif GT1-motif HSE I-box MSA-like Skn-1_motif TATA-box box II rbcS-CMA7a             |
| <b>VrKUP/HAK/KT17</b>  | AAGAA-motif ABRE ACE ATCT-motif Box II CAAT-box CCAAT-box G-box GA-motif GATA-motif GT1-motif HSE I-box MSA-like Skn-1_motif TATA-box box II rbcS-CMA7a                  |
| <b>VrHKT1.1</b>        | AAGAA-motif ABRE ACE ATCT-motif Box II CAAT-box CCAAT-box G-Box GA-motif GATA-motif GT1-motif HSE I-box MSA-like Skn-1_motif TATA-box box II                             |
| <b>VrKUP/HAK/KT1.1</b> | AAGAA-motif ABRE ACE ATCT-motif Box II CAAT-box CCAAT-box G-Box GA-motif GATA-motif GT1-motif HSE I-box MSA-like Skn-1_motif TATA-box box II rbcS-CMA7a                  |
| <b>VrKUP/HAK/KT12</b>  | AAGAA-motif ABRE ACE ATCT-motif Box II CAAT-box CCAAT-box G-box GA-motif GATA-motif GT1-motif HSE I-box MSA-like Skn-1_motif TATA-box box II rbcS-CMA7a                  |
| <b>VrHKT1.2</b>        | AAGAA-motif ABRE ACE ATCT-motif Box II CAAT-box CCAAT-box G-box GA-motif GATA-motif GT1-motif HSE I-box MSA-like Skn-1_motif TATA-box box II rbcS-CMA7a                  |
| <b>VrKUP/HAK/KT8.1</b> | AAGAA-motif ABRE ACE ATCT-motif Box II CAAT-box CCAAT-box G-box GA-motif GATA-motif GT1-motif HSE I-box MSA-like Skn-1_motif TATA-box box II rbcS-CMA7a                  |
| <b>VrKUP/HAK/KT6.2</b> | AAGAA-motif ABRE ACE ATCT-motif Box II CAAT-box CCAAT-box G-box GA-motif GATA-motif GT1-motif HSE I-box MSA-like Skn-1_motif TATA-box box II rbcS-CMA7a                  |
| <b>VrKUP/HAK/KT6.1</b> | AAGAA-motif ABRE ACE ATCT-motif Box II CAAT-box CCAAT-box G-Box GA-motif GATA-motif GT1-motif HSE I-box MSA-like Skn-1_motif TATA-box box II rbcS-CMA7a                  |
| <b>VrKUP/HAK/KT11</b>  | AAGAA-motif ABRE ACE ATCT-motif Box II CAAT-box CCAAT-box G-Box GA-motif GATA-motif GT1-motif HSE I-box MSA-like Skn-1_motif TATA-box box II rbcS-CMA7a                  |
| <b>VrKUP/HAK/KT7</b>   | AAGAA-motif ABRE ACE ATCT-motif Box II CAAT-box CCAAT-box G-box GA-motif GATA-motif GT1-motif HSE I-box MSA-like Skn-1_motif TATA-box box II rbcS-CMA7a                  |
| <b>VrKUP/HAK/KT3</b>   | AAGAA-motif ABRE ACE ATCT-motif Box II CAAT-box CCAAT-box G-Box GA-motif GATA-motif GT1-motif HSE I-box MSA-like Skn-1_motif TATA-box box II rbcS-CMA7a                  |
| <b>VrKAE6</b>          | AAGAA-motif ABRE ACE ATCT-motif Box II CAAT-box CCAAT-box G-Box GA-motif GATA-motif GT1-motif HSE I-box MSA-like Skn-1_motif TATA-box box II rbcS-CMA7a                  |
| <b>VrKAE3</b>          | AAGAA-motif ABRE ACE ATCT-motif Box II CAAT-box CCAAT-box G-Box GA-motif GATA-motif GT1-motif HSE I-box MSA-like Skn-1_motif TATA-box box II rbcS-CMA7a                  |
| <b>VrKUP/HAK/KT1.2</b> | AAGAA-motif, ABRE, ACE, ATCT-motif, Box II, CAAT-box, CCAAT-box, G-Box, GA-motif, GATA-motif, GT1-motif, HSE, I-box, MSA-like, Skn-1_motif, TATA-box, box II, rbcS-CMA7a |
| <b>VrKEA2.1</b>        | AAGAA-motif, ABRE, ACE, ATCT-motif, Box II, CAAT-box, CCAAT-box, G-box, GA-motif, GATA-motif, GT1-motif, HSE, I-box, MSA-like, Skn-1_motif, TATA-box, box II, rbcS-CMA7a |
| <b>VrKEA2.2</b>        | AAGAA-motif, ABRE, ACE, ATCT-motif, Box II, CAAT-box, CCAAT-box, G-Box, GA-motif, GATA-motif, GT1-motif, I-box, MSA-like, Skn-1_motif, TATA-box, box II, rbcS-CMA7a      |
| <b>VrKAE5</b>          | AAGAA-motif ABRE ACE ATCT-motif Box II CAAT-box CCAAT-box G-Box GA-motif GATA-motif GT1-motif HSE I-box MSA-like Skn-1_motif TATA-box box II rbcS-CMA7a                  |

**Supplementary Table S3:** List of primers used for qRT-PCR analysis

| Sr. No | Gene Name        | Primer Sequence          |
|--------|------------------|--------------------------|
| 1      | VrHKT1.1F        | CTTTGTCCCCACCAACGAGA     |
|        | VrHKT1.1R        | CACGGTGGATATAGGGCGTT     |
| 2      | VrHKT1.2F        | CCTTCCATGTCCACCCCTTC     |
|        | VrHKT1.2R        | GTCTAACGGGGGTTCCTGGG     |
| 3      | VrKAT1F          | ACAGGGAAGCCACGGAATAAT    |
|        | VrKAT1R          | AATTGCTGCTCCTACGCCTT     |
| 4      | VrAKT1.1F        | ACTAGTGAGCCAACCATGCC     |
|        | VrAKT1.1R        | ACCTTTTCCAGATGGCCCTG     |
| 5      | VrAKT2F          | ACTGCAATGTGGGGTGCTAT     |
|        | VrAKT2R          | TCACCTGCTGTGTTCTGGTC     |
| 6      | VrSKORF          | ACACTGAGGCTGCTGTCATT     |
|        | VrSKORR          | GGGTGACATCCATAATTGACCA   |
| 7      | VrKAT2F          | TTGTGGCAGTCTGTCGTCTG     |
|        | VrKAT2R          | GGTAAACGTTGCATTGGCTGA    |
| 8      | VrKEA5F          | ATGGGAAAACAAAACCTTCTGG   |
|        | VrKEA5R          | CAATTTGACGTCGCCGAAT      |
| 9      | VrTPK3F          | AAGTTGCCAAACCCCTCACA     |
|        | VrTPK3R          | GGCTTCTTGAGCCTTCCCAT     |
| 10     | VrKUP/HAK/KT4F   | CTGGAGTCCCTGCCAGTTTT     |
|        | VrKUP/HAK/KT4R   | GCACCGGTACAGTCTTCACA     |
| 11     | VrKUP/HAK/KT5F   | TTGTCTGAGTGTGGACAGGT     |
|        | VrKUP/HAK/KT5R   | GCAGCTGCTCAAAAGTCTGG     |
| 12     | VrKUP/HAK/KT8.1F | TGTTTGCTTTAACAGGCTTGG    |
|        | VrKUP/HAK/KT8.1R | GCAAATTGCCAGCAAAATGCTT   |
| 13     | VractinF         | TTCCTTTTCTTCGTTTTTCATGCT |
|        | VractinR         | AAACCGAGGCACCTAATTCTTG   |

**Supplementary Table S4:** Description of various conserved domains found in the protein sequences of potassium transport related proteins.

| Name of domain | Full name                                                  | Accession number | Function                                                                                                                                   |
|----------------|------------------------------------------------------------|------------------|--------------------------------------------------------------------------------------------------------------------------------------------|
| <i>K_trans</i> | <i>K<sup>+</sup> potassium transporter</i>                 | PF02705          | Potassium transport                                                                                                                        |
| PLN            | Potassium transporter                                      | PLN00151         | Potassium transport                                                                                                                        |
| PotE           | Amino acid transporter                                     | COG0531          | Amino acid transport and metabolism                                                                                                        |
| TrkH           | Cation transport protein                                   | c117365          | Active sodium up-take utilizing ATP in the process.                                                                                        |
| TrkA_N         | Potassium ion transmembrane transporter activity           | pfam02254        | This domain binds to NAD                                                                                                                   |
| RILP-like      | Rab interacting lysosomal protein-like                     | c123720          | Regulation of cellular morphology                                                                                                          |
| Na_H_Exchanger | Sodium/hydrogen exchanger family                           | pfam00999        | Maintaining the pH of actively metabolising cells                                                                                          |
| KefB           | Kef-type K <sup>+</sup> transport system                   | COG0475          | Membrane component KefB [Inorganic ion transport and metabolism]                                                                           |
| Ion_trans_2    | Ion channel                                                | pfam07885        | This family includes the two-membrane helix type ion channels found in bacteria.                                                           |
| EF-hand_7      | EF-hand domain pair                                        | pfam13499        | Calcium-binding proteins.                                                                                                                  |
| EFh            | EF-hand                                                    | c108302          | Calcium binding motif                                                                                                                      |
| ANK            | ANK repeat                                                 | sd00045          | Scaffolds for protein-protein interactions                                                                                                 |
| KHA            | Kha                                                        | pfam11834        | Dimerization domain of potassium ion channel                                                                                               |
| CAP_ED         | Effector domain of the CAP family of transcription factors | cd00038          | Binds cAMP, FNR (fumarate and nitrate reduction), which uses an iron-sulfur cluster to sense oxygen) and CooA, a heme containing CO sensor |
| cNMP_binding   | Cyclic nucleotide-binding domain                           | PF00027          | Cyclic nucleotide-binding                                                                                                                  |
| PLN03192       | Voltage-dependent potassium channel                        | PLN03192         | Voltage-dependent potassium transport.                                                                                                     |
